# Supplementary material for: Novel groups and unique distribution of phage phoH genes in paddy waters in northeast China
Source: PubMed Central journal article supplement (PMC5133604; doi:10.1038/srep38428), 2016-12-02
Supplement: srep38428-s1.pdf [file srep38428-s1.pdf]

**Title:** Novel groups and unique distribution of phage *phoH* genes in paddy waters in northeast China

**Author names:** Xinzhen Wang<sup>1,2</sup>, Junjie Liu<sup>1</sup>, Zhenhua Yu<sup>1</sup>, Jian Jin<sup>1</sup>, Xiaobing Liu<sup>1</sup>, Guanghua Wang<sup>1,\*</sup>

**Affiliation:**

<sup>1</sup>*Key Laboratory of Mollisols Agroecology, Northeast Institute of Geography and Agroecology, Chinese Academy of Sciences, Harbin 150081, China*

<sup>2</sup>*University of Chinese Academy of Sciences, Beijing 100049, China*

**\*Corresponding author:** Guanghua Wang

**Corresponding address:** Key Laboratory of Mollisols Agroecology, Northeast Institute of Geography and Agroecology, Chinese Academy of Sciences, Harbin 150081, China

**Tel:** +86-451-86602745

**Fax:** +86-451-86603736

**E-mail address:** wanggh@iga.ac.cn; guanghuawang@hotmail.com

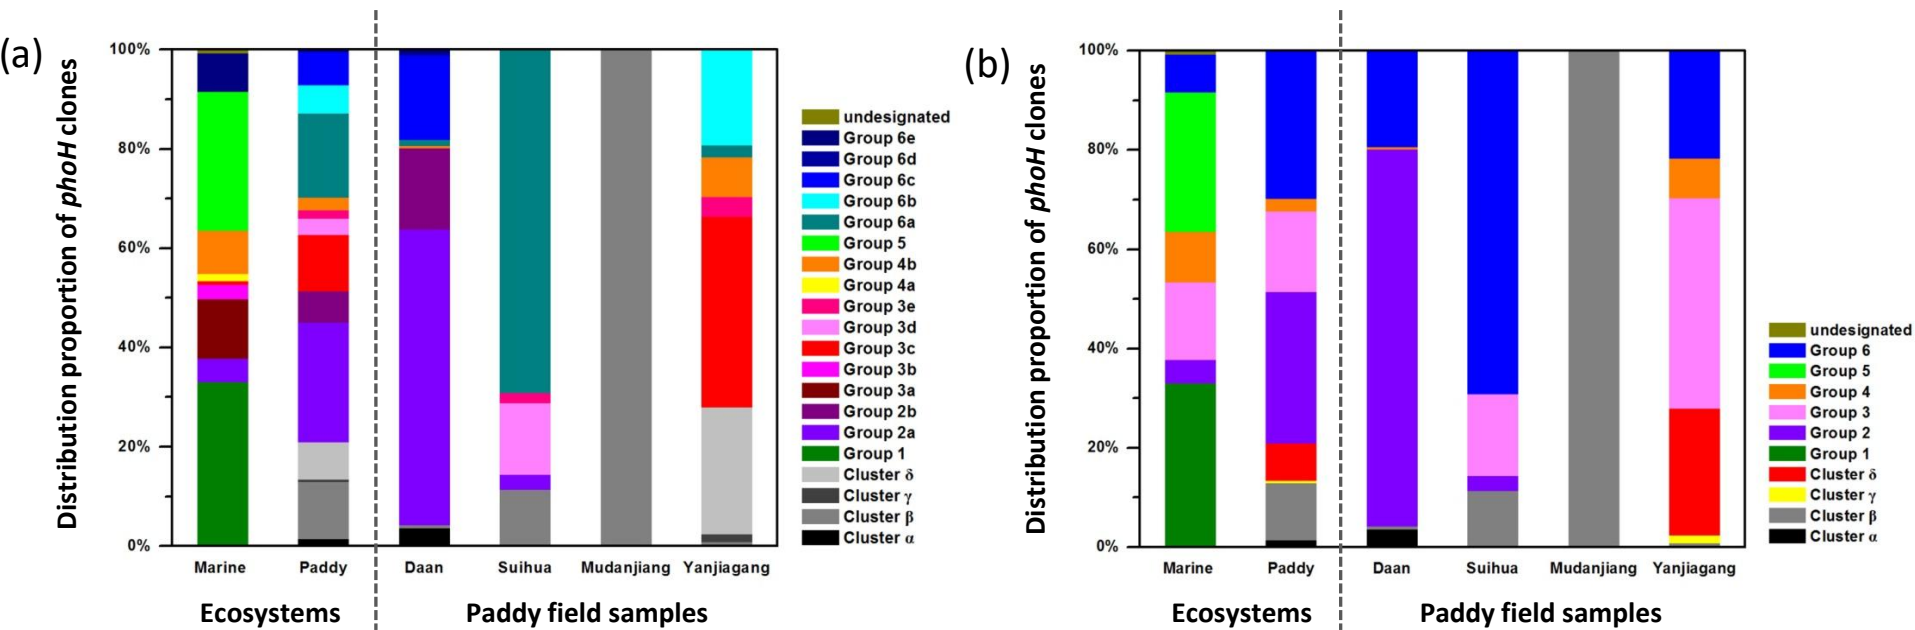

**Fig. S1. Comparison of distribution proportions of the phage *phoH* clones in different groups. (a) The group/subgroup composition of each sample; (b) The overall group composition of each sample by collapsing the subgroups.** The phage *phoH* clones were obtained from paddy samples from Daan, Suihua, Mudanjiang and Yanjiagang in this study and from marine samples from the Sargasso Sea and worldwide oceans<sup>23</sup>.

**Table S1.** Properties of soil samples collected from open paddy fields.

| Sample | Location                 | Soil type            | Latitude and longitude | Total P (g kg <sup>-1</sup> ) | Total C (g kg <sup>-1</sup> ) | Total N (g kg <sup>-1</sup> ) | C/N   | pH   |
|--------|--------------------------|----------------------|------------------------|-------------------------------|-------------------------------|-------------------------------|-------|------|
| DA     | Daan, Jilin              | Saline-alkaline soil | 45 °36 N,123 °50 E     | 0.45                          | 12.52                         | 0.47                          | 26.64 | 7.46 |
| SH     | Suihua, Heilongjiang     | Black soil           | 46 °43 N,126 °59 E     | 1.00                          | 34.69                         | 2.56                          | 13.55 | 5.76 |
| MDJ    | Mudanjiang, Heilongjiang | Dark brown soil      | 44 °26 N,129 °29 E     | 0.63                          | 15.21                         | 0.99                          | 15.36 | 6.10 |
| YJG    | Yanjiagang, Heilongjiang | Black soil           | 45 °35 N,126 °20 E     | 0.50                          | 14.06                         | 0.91                          | 15.45 | 5.67 |

C, carbon; N, nitrogen; P, phosphorus.

**Table S2.** Source of phage *phoH* sequences used for the NMDS analysis.

| Source | Sample site        | NCBI accession number | Number of clones | Reference                    |
|--------|--------------------|-----------------------|------------------|------------------------------|
| Paddy  | Daan               |                       | 166              |                              |
|        | Suihua             | KX189635-KX190058     | 97               | This study                   |
|        | Mudanjiang         |                       | 36               |                              |
|        | Yanjiagang         |                       | 125              |                              |
| -----  | -----              |                       |                  |                              |
| Marine | Raunefjorden       |                       | 18               |                              |
|        | British Columbia   |                       | 18               |                              |
|        | Gulf of Mexico     |                       | 19               |                              |
|        | Kongsfjorden       |                       | 19               |                              |
|        | Mediterranean Sea  | JF963974-JF964153     | 18               | Goldsmith <i>et al.</i> 2011 |
|        | Sargasso Sea       | JF964160-JF964251     | 69               |                              |
|        | Sargasso Sea 0m    |                       | 38               |                              |
|        | Sargasso Sea 200m  |                       | 21               |                              |
|        | Sargasso Sea 500m  |                       | 24               |                              |
|        | Sargasso Sea 1000m |                       | 28               |                              |

**Table S3.** The closest relative and the distribution of phylogenetic groups of sequenced *phoH* clones from the four paddy water samples at the amino acid level in this study.

| Clone name | Length <sup>a</sup> | Closest relative           |                             |                               | Alignment | Identity (%) | Phylogenetic group |
|------------|---------------------|----------------------------|-----------------------------|-------------------------------|-----------|--------------|--------------------|
|            |                     | Clone/isolate              | Source                      | Accession number <sup>b</sup> |           |              |                    |
| SH-phoH-1  | 128                 | GOM_phoH_09                | Gulf of Mexico              | AEQ27527                      | 70/127    | 55           | Group β            |
| SH-phoH-2  | 129                 | MED_phoH_13                | Mediterranean surface water | AEQ27550                      | 76/128    | 59           | Group 6a           |
| SH-phoH-3  | 129                 | SAR_0m_phoH_30             | Sargasso Sea                | AEQ27325                      | 74/128    | 58           | Group 3e           |
| SH-phoH-4  | 129                 | MED_phoH_13                | Mediterranean surface water | AEQ27550                      | 75/128    | 59           | Group 6a           |
| SH-phoH-5  | 129                 | MED_phoH_13                | Mediterranean surface water | AEQ27550                      | 76/128    | 59           | Group 6a           |
| SH-phoH-6  | 129                 | MED_phoH_13                | Mediterranean surface water | AEQ27550                      | 76/128    | 59           | Group 6a           |
| SH-phoH-7  | 129                 | MED_phoH_13                | Mediterranean surface water | AEQ27550                      | 75/128    | 59           | Group 6a           |
| SH-phoH-8  | 129                 | MED_phoH_13                | Mediterranean surface water | AEQ27550                      | 76/128    | 59           | Group 6a           |
| SH-phoH-9  | 128                 | GOM_phoH_09                | Gulf of Mexico              | AEQ27527                      | 70/127    | 55           | Group β            |
| SH-phoH-10 | 129                 | MED_phoH_13                | Mediterranean surface water | AEQ27550                      | 76/128    | 59           | Group 6a           |
| SH-phoH-11 | 128                 | GOM_phoH_09                | Gulf of Mexico              | AEQ27527                      | 70/127    | 55           | Group β            |
| SH-phoH-12 | 132                 | SAR_0m_phoH_29             | Sargasso Sea                | AEQ27324                      | 75/134    | 56           | Group 3d           |
| SH-phoH-13 | 129                 | MED_phoH_13                | Mediterranean surface water | AEQ27550                      | 75/128    | 59           | Group 6a           |
| SH-phoH-14 | 128                 | GOM_phoH_09                | Gulf of Mexico              | AEQ27527                      | 70/127    | 55           | Group β            |
| SH-phoH-15 | 129                 | MED_phoH_13                | Mediterranean surface water | AEQ27550                      | 76/128    | 59           | Group 6a           |
| SH-phoH-16 | 129                 | MED_phoH_13                | Mediterranean surface water | AEQ27550                      | 75/128    | 59           | Group 6a           |
| SH-phoH-17 | 132                 | SAR_1000m_phoH_11          | Sargasso Sea                | AEQ27389                      | 74/134    | 55           | Group 3d           |
| SH-phoH-18 | 129                 | MED_phoH_13                | Mediterranean surface water | AEQ27550                      | 75/128    | 59           | Group 6a           |
| SH-phoH-19 | 128                 | SAR_phoH_Mar_2011_0m_04    | Sargasso Sea                | AKV56976                      | 69/127    | 54           | Group β            |
| SH-phoH-20 | 129                 | MED_phoH_13                | Mediterranean surface water | AEQ27550                      | 74/128    | 58           | Group 6a           |
| SH-phoH-21 | 132                 | SAR_0m_phoH_29             | Sargasso Sea                | AEQ27324                      | 75/134    | 56           | Group 3d           |
| SH-phoH-22 | 132                 | SAR_0m_phoH_29             | Sargasso Sea                | AEQ27324                      | 75/134    | 56           | Group 3d           |
| SH-phoH-23 | 129                 | MED_phoH_13                | Mediterranean surface water | AEQ27550                      | 76/128    | 59           | Group 6a           |
| SH-phoH-24 | 135                 | SAR_phoH_Sept_2010_0m_09   | Sargasso Sea                | AKV56959                      | 114/134   | 85           | Group 2a           |
| SH-phoH-25 | 129                 | MED_phoH_13                | Mediterranean surface water | AEQ27550                      | 75/128    | 59           | Group 6a           |
| SH-phoH-26 | 132                 | SAR_0m_phoH_29             | Sargasso Sea                | AEQ27324                      | 75/134    | 56           | Group 3d           |
| SH-phoH-27 | 129                 | MED_phoH_13                | Mediterranean surface water | AEQ27550                      | 76/128    | 59           | Group 6a           |
| SH-phoH-28 | 129                 | MED_phoH_13                | Mediterranean surface water | AEQ27550                      | 76/128    | 59           | Group 6a           |
| SH-phoH-29 | 132                 | SAR_phoH_Sept_2011_100m_02 | Sargasso Sea                | AKV57024                      | 75/134    | 56           | Group 3d           |
| SH-phoH-30 | 135                 | SAR_phoH_Sept_2010_0m_09   | Sargasso Sea                | AKV56959                      | 113/134   | 84           | Group 2a           |
| SH-phoH-31 | 129                 | MED_phoH_13                | Mediterranean surface water | AEQ27550                      | 76/128    | 59           | Group 6a           |
| SH-phoH-32 | 129                 | MED_phoH_13                | Mediterranean surface water | AEQ27550                      | 77/128    | 60           | Group 6a           |
| SH-phoH-33 | 129                 | MED_phoH_13                | Mediterranean surface water | AEQ27550                      | 74/128    | 58           | Group 6a           |
| SH-phoH-34 | 129                 | MED_phoH_13                | Mediterranean surface water | AEQ27550                      | 75/128    | 59           | Group 6a           |
| SH-phoH-35 | 129                 | MED_phoH_13                | Mediterranean surface water | AEQ27550                      | 76/128    | 59           | Group 6a           |
| SH-phoH-36 | 129                 | MED_phoH_13                | Mediterranean surface water | AEQ27550                      | 76/128    | 59           | Group 6a           |
| SH-phoH-37 | 132                 | SAR_1000m_phoH_11          | Sargasso Sea                | AEQ27389                      | 74/134    | 55           | Group 3d           |
| SH-phoH-38 | 128                 | GOM_phoH_09                | Gulf of Mexico              | AEQ27527                      | 70/127    | 55           | Group β            |
| SH-phoH-39 | 128                 | GOM_phoH_09                | Gulf of Mexico              | AEQ27527                      | 70/127    | 55           | Group β            |
| SH-phoH-40 | 132                 | SAR_phoH_Sept_2011_100m_02 | Sargasso Sea                | AKV57024                      | 74/134    | 55           | Group 3d           |
| SH-phoH-41 | 129                 | MED_phoH_13                | Mediterranean surface water | AEQ27550                      | 73/128    | 57           | Group 6a           |
| SH-phoH-42 | 132                 | SAR_0m_phoH_29             | Sargasso Sea                | AEQ27324                      | 75/134    | 56           | Group 3d           |
| SH-phoH-43 | 129                 | MED_phoH_13                | Mediterranean surface water | AEQ27550                      | 76/128    | 59           | Group 6a           |
| SH-phoH-44 | 129                 | MED_phoH_13                | Mediterranean surface water | AEQ27550                      | 75/128    | 59           | Group 6a           |
| SH-phoH-45 | 129                 | MED_phoH_13                | Mediterranean surface water | AEQ27550                      | 76/128    | 59           | Group 6a           |
| SH-phoH-46 | 132                 | SAR_1000m_phoH_11          | Sargasso Sea                | AEQ27389                      | 74/134    | 55           | Group 3d           |
| SH-phoH-47 | 129                 | MED_phoH_13                | Mediterranean surface water | AEQ27550                      | 76/128    | 59           | Group 6a           |
| SH-phoH-48 | 129                 | MED_phoH_13                | Mediterranean surface water | AEQ27550                      | 76/128    | 59           | Group 6a           |
| SH-phoH-49 | 129                 | MED_phoH_13                | Mediterranean surface water | AEQ27550                      | 77/128    | 60           | Group 6a           |
| SH-phoH-50 | 132                 | SAR_1000m_phoH_11          | Sargasso Sea                | AEQ27389                      | 72/134    | 54           | Group 3d           |
| SH-phoH-51 | 129                 | MED_phoH_13                | Mediterranean surface water | AEQ27550                      | 75/128    | 59           | Group 6a           |
| SH-phoH-52 | 129                 | MED_phoH_13                | Mediterranean surface water | AEQ27550                      | 76/128    | 59           | Group 6a           |
| SH-phoH-53 | 129                 | MED_phoH_13                | Mediterranean surface water | AEQ27550                      | 76/128    | 59           | Group 6a           |
| SH-phoH-54 | 129                 | MED_phoH_13                | Mediterranean surface water | AEQ27550                      | 77/128    | 60           | Group 6a           |
| SH-phoH-55 | 129                 | MED_phoH_13                | Mediterranean surface water | AEQ27550                      | 76/128    | 59           | Group 6a           |
| SH-phoH-56 | 128                 | GOM_phoH_09                | Gulf of Mexico              | AEQ27527                      | 70/127    | 55           | Group β            |
| SH-phoH-57 | 128                 | GOM_phoH_09                | Gulf of Mexico              | AEQ27527                      | 70/127    | 55           | Group β            |
| SH-phoH-58 | 129                 | SAR_0m_phoH_30             | Sargasso Sea                | AEQ27325                      | 73/128    | 57           | Group 3e           |
| SH-phoH-59 | 129                 | MED_phoH_13                | Mediterranean surface water | AEQ27550                      | 76/128    | 59           | Group 6a           |
| SH-phoH-60 | 129                 | MED_phoH_13                | Mediterranean surface water | AEQ27550                      | 76/128    | 59           | Group 6a           |
| SH-phoH-61 | 132                 | SAR_0m_phoH_29             | Sargasso Sea                | AEQ27324                      | 75/134    | 56           | Group 3d           |
| SH-phoH-62 | 129                 | MED_phoH_13                | Mediterranean surface water | AEQ27550                      | 75/128    | 59           | Group 6a           |
| SH-phoH-63 | 129                 | MED_phoH_13                | Mediterranean surface water | AEQ27550                      | 76/128    | 59           | Group 6a           |
| SH-phoH-64 | 129                 | MED_phoH_13                | Mediterranean surface water | AEQ27550                      | 76/128    | 59           | Group 6a           |
| SH-phoH-65 | 129                 | MED_phoH_13                | Mediterranean surface water | AEQ27550                      | 76/128    | 59           | Group 6a           |
| SH-phoH-66 | 129                 | MED_phoH_13                | Mediterranean surface water | AEQ27550                      | 77/128    | 60           | Group 6a           |
| SH-phoH-67 | 129                 | MED_phoH_13                | Mediterranean surface water | AEQ27550                      | 76/128    | 59           | Group 6a           |
| SH-phoH-68 | 129                 | MED_phoH_13                | Mediterranean surface water | AEQ27550                      | 75/128    | 59           | Group 6a           |
| SH-phoH-69 | 132                 | SAR_0m_phoH_29             | Sargasso Sea                | AEQ27324                      | 74/134    | 55           | Group 3d           |
| SH-phoH-70 | 129                 | MED_phoH_13                | Mediterranean surface water | AEQ27550                      | 76/128    | 59           | Group 6a           |
| SH-phoH-71 | 129                 | MED_phoH_13                | Mediterranean surface water | AEQ27550                      | 76/128    | 59           | Group 6a           |
| SH-phoH-72 | 129                 | MED_phoH_13                | Mediterranean surface water | AEQ27550                      | 76/128    | 59           | Group 6a           |
| SH-phoH-73 | 129                 | MED_phoH_13                | Mediterranean surface water | AEQ27550                      | 75/128    | 59           | Group 6a           |
| SH-phoH-74 | 129                 | MED_phoH_13                | Mediterranean surface water | AEQ27550                      | 75/128    | 59           | Group 6a           |
| SH-phoH-75 | 129                 | MED_phoH_13                | Mediterranean surface water | AEQ27550                      | 76/128    | 59           | Group 6a           |
| SH-phoH-76 | 129                 | MED_phoH_13                | Mediterranean surface water | AEQ27550                      | 76/128    | 59           | Group 6a           |

|             |     |                                      |                             |              |         |    |          |
|-------------|-----|--------------------------------------|-----------------------------|--------------|---------|----|----------|
| SH-phoH-77  | 129 | MED_phoH_13                          | Mediterranean surface water | AEQ27550     | 75/128  | 59 | Group 6a |
| SH-phoH-78  | 129 | MED_phoH_13                          | Mediterranean surface water | AEQ27550     | 76/128  | 59 | Group 6a |
| SH-phoH-79  | 132 | SAR_0m_phoH_29                       | Sargasso Sea                | AEQ27324     | 75/134  | 56 | Group 3d |
| SH-phoH-80  | 129 | MED_phoH_13                          | Mediterranean surface water | AEQ27550     | 76/128  | 59 | Group 6a |
| SH-phoH-81  | 129 | MED_phoH_13                          | Mediterranean surface water | AEQ27550     | 76/128  | 59 | Group 6a |
| SH-phoH-82  | 135 | SAR_phoH_Sept_2010_0m_09             | Sargasso Sea                | AKV56959     | 113/134 | 84 | Group 2a |
| SH-phoH-83  | 129 | MED_phoH_13                          | Mediterranean surface water | AEQ27550     | 76/128  | 59 | Group 6a |
| SH-phoH-84  | 129 | MED_phoH_13                          | Mediterranean surface water | AEQ27550     | 75/128  | 59 | Group 6a |
| SH-phoH-85  | 128 | GOM_phoH_09                          | Gulf of Mexico              | AEQ27527     | 70/127  | 55 | Group β  |
| SH-phoH-86  | 129 | MED_phoH_13                          | Mediterranean surface water | AEQ27550     | 75/128  | 59 | Group 6a |
| SH-phoH-87  | 129 | MED_phoH_13                          | Mediterranean surface water | AEQ27550     | 76/128  | 59 | Group 6a |
| SH-phoH-88  | 129 | MED_phoH_13                          | Mediterranean surface water | AEQ27550     | 76/128  | 59 | Group 6a |
| SH-phoH-89  | 129 | MED_phoH_13                          | Mediterranean surface water | AEQ27550     | 76/128  | 59 | Group 6a |
| SH-phoH-90  | 129 | MED_phoH_13                          | Mediterranean surface water | AEQ27550     | 76/128  | 59 | Group 6a |
| SH-phoH-91  | 129 | MED_phoH_13                          | Mediterranean surface water | AEQ27550     | 75/128  | 59 | Group 6a |
| SH-phoH-92  | 129 | MED_phoH_13                          | Mediterranean surface water | AEQ27550     | 76/128  | 59 | Group 6a |
| SH-phoH-93  | 129 | MED_phoH_13                          | Mediterranean surface water | AEQ27550     | 76/128  | 59 | Group 6a |
| SH-phoH-94  | 129 | MED_phoH_13                          | Mediterranean surface water | AEQ27550     | 76/128  | 59 | Group 6a |
| SH-phoH-95  | 129 | MED_phoH_13                          | Mediterranean surface water | AEQ27550     | 76/128  | 59 | Group 6a |
| SH-phoH-96  | 129 | MED_phoH_13                          | Mediterranean surface water | AEQ27550     | 75/128  | 59 | Group 6a |
| SH-phoH-97  | 128 | GOM_phoH_09                          | Gulf of Mexico              | AEQ27527     | 70/127  | 55 | Group β  |
| MDJ-phoH-1  | 128 | GOM_phoH_09                          | Gulf of Mexico              | AEQ27527     | 70/127  | 55 | Group β  |
| MDJ-phoH-2  | 128 | GOM_phoH_09                          | Gulf of Mexico              | AEQ27527     | 70/127  | 55 | Group β  |
| MDJ-phoH-3  | 128 | GOM_phoH_09                          | Gulf of Mexico              | AEQ27527     | 70/127  | 55 | Group β  |
| MDJ-phoH-4  | 128 | GOM_phoH_09                          | Gulf of Mexico              | AEQ27527     | 70/127  | 55 | Group β  |
| MDJ-phoH-5  | 128 | GOM_phoH_09                          | Gulf of Mexico              | AEQ27527     | 70/127  | 55 | Group β  |
| MDJ-phoH-6  | 128 | SAR_0m_phoH_30                       | Sargasso Sea                | AEQ27325     | 75/128  | 59 | Group β  |
| MDJ-phoH-7  | 128 | GOM_phoH_09                          | Gulf of Mexico              | AEQ27527     | 70/127  | 55 | Group β  |
| MDJ-phoH-8  | 128 | GOM_phoH_09                          | Gulf of Mexico              | AEQ27527     | 70/127  | 55 | Group β  |
| MDJ-phoH-9  | 128 | GOM_phoH_09                          | Gulf of Mexico              | AEQ27527     | 70/127  | 55 | Group β  |
| MDJ-phoH-10 | 128 | SAR_0m_phoH_30                       | Sargasso Sea                | AEQ27325     | 73/128  | 57 | Group β  |
| MDJ-phoH-11 | 128 | GOM_phoH_09                          | Gulf of Mexico              | AEQ27527     | 70/127  | 55 | Group β  |
| MDJ-phoH-12 | 128 | GOM_phoH_09                          | Gulf of Mexico              | AEQ27527     | 70/127  | 55 | Group β  |
| MDJ-phoH-13 | 128 | SAR_phoH_Mar_2011_0m_04              | Sargasso Sea                | AKV56976     | 69/127  | 54 | Group β  |
| MDJ-phoH-14 | 128 | GOM_phoH_09                          | Gulf of Mexico              | AEQ27527     | 70/127  | 55 | Group β  |
| MDJ-phoH-15 | 128 | GOM_phoH_09                          | Gulf of Mexico              | AEQ27527     | 70/127  | 55 | Group β  |
| MDJ-phoH-16 | 128 | GOM_phoH_09                          | Gulf of Mexico              | AEQ27527     | 70/127  | 55 | Group β  |
| MDJ-phoH-17 | 128 | GOM_phoH_09                          | Gulf of Mexico              | AEQ27527     | 69/127  | 54 | Group β  |
| MDJ-phoH-18 | 128 | SAR_0m_phoH_37                       | Sargasso Sea                | AEQ27332     | 70/127  | 55 | Group β  |
| MDJ-phoH-19 | 128 | SAR_phoH_Mar_2011_0m_04              | Sargasso Sea                | AKV56976     | 69/127  | 54 | Group β  |
| MDJ-phoH-20 | 128 | GOM_phoH_09                          | Gulf of Mexico              | AEQ27527     | 71/127  | 56 | Group β  |
| MDJ-phoH-21 | 128 | GOM_phoH_09                          | Gulf of Mexico              | AEQ27527     | 70/127  | 55 | Group β  |
| MDJ-phoH-22 | 128 | GOM_phoH_09                          | Gulf of Mexico              | AEQ27527     | 70/127  | 55 | Group β  |
| MDJ-phoH-23 | 128 | GOM_phoH_09                          | Gulf of Mexico              | AEQ27527     | 70/127  | 55 | Group β  |
| MDJ-phoH-24 | 128 | GOM_phoH_09                          | Gulf of Mexico              | AEQ27527     | 70/127  | 55 | Group β  |
| MDJ-phoH-25 | 128 | GOM_phoH_09                          | Gulf of Mexico              | AEQ27527     | 69/127  | 54 | Group β  |
| MDJ-phoH-26 | 128 | GOM_phoH_09                          | Gulf of Mexico              | AEQ27527     | 70/127  | 55 | Group β  |
| MDJ-phoH-27 | 128 | GOM_phoH_09                          | Gulf of Mexico              | AEQ27527     | 70/127  | 55 | Group β  |
| MDJ-phoH-28 | 128 | SAR_phoH_Mar_2011_0m_04              | Sargasso Sea                | AKV56976     | 69/127  | 54 | Group β  |
| MDJ-phoH-29 | 128 | GOM_phoH_09                          | Gulf of Mexico              | AEQ27527     | 70/127  | 55 | Group β  |
| MDJ-phoH-30 | 128 | GOM_phoH_09                          | Gulf of Mexico              | AEQ27527     | 69/127  | 54 | Group β  |
| MDJ-phoH-31 | 128 | GOM_phoH_09                          | Gulf of Mexico              | AEQ27527     | 69/127  | 54 | Group β  |
| MDJ-phoH-32 | 128 | GOM_phoH_09                          | Gulf of Mexico              | AEQ27527     | 70/127  | 55 | Group β  |
| MDJ-phoH-33 | 128 | GOM_phoH_09                          | Gulf of Mexico              | AEQ27527     | 70/127  | 55 | Group β  |
| MDJ-phoH-34 | 128 | GOM_phoH_09                          | Gulf of Mexico              | AEQ27527     | 68/127  | 54 | Group β  |
| MDJ-phoH-35 | 128 | GOM_phoH_09                          | Gulf of Mexico              | AEQ27527     | 70/127  | 55 | Group β  |
| MDJ-phoH-36 | 128 | GOM_phoH_09                          | Gulf of Mexico              | AEQ27527     | 70/127  | 55 | Group β  |
| DA-phoH-1   | 135 | <i>Synechococcus</i> phage S-SSM7    | Sargasso Sea                | YP_004324370 | 115/134 | 86 | Group 2a |
| DA-phoH-2   | 135 | uncultured Mediterranean phage uvMED | Mediterranean Sea           | BAR30472     | 105/134 | 78 | Group 2b |
| DA-phoH-3   | 135 | <i>Synechococcus</i> phage S-SSM7    | Sargasso Sea                | YP_004324370 | 114/134 | 85 | Group 2a |
| DA-phoH-4   | 135 | <i>Synechococcus</i> phage S-SSM7    | Sargasso Sea                | YP_004324370 | 115/134 | 86 | Group 2a |
| DA-phoH-5   | 135 | <i>Synechococcus</i> phage S-SSM7    | Sargasso Sea                | YP_004324370 | 115/134 | 86 | Group 2a |
| DA-phoH-6   | 135 | <i>Synechococcus</i> phage S-SSM7    | Sargasso Sea                | YP_004324370 | 113/134 | 84 | Group 2a |
| DA-phoH-7   | 135 | uncultured Mediterranean phage uvMED | Mediterranean Sea           | BAR30472     | 106/134 | 79 | Group 2b |
| DA-phoH-8   | 135 | <i>Synechococcus</i> phage S-SSM7    | Sargasso Sea                | YP_004324370 | 115/134 | 86 | Group 2a |
| DA-phoH-9   | 129 | MED_phoH_02                          | Mediterranean Sea           | AEQ27539     | 79/128  | 62 | Group 6c |
| DA-phoH-10  | 135 | uncultured Mediterranean phage uvMED | Mediterranean Sea           | BAR30472     | 107/134 | 80 | Group 2b |
| DA-phoH-11  | 135 | uncultured Mediterranean phage uvMED | Mediterranean Sea           | BAR30472     | 106/134 | 79 | Group 2b |
| DA-phoH-12  | 135 | uncultured Mediterranean phage uvMED | Mediterranean Sea           | BAR30472     | 105/134 | 78 | Group 2b |
| DA-phoH-13  | 135 | <i>Synechococcus</i> phage S-SSM7    | Sargasso Sea                | YP_004324370 | 115/134 | 86 | Group 2a |
| DA-phoH-14  | 135 | <i>Synechococcus</i> phage S-SSM7    | Sargasso Sea                | YP_004324370 | 115/134 | 86 | Group 2a |
| DA-phoH-15  | 135 | <i>Synechococcus</i> phage S-RSM4    | Red Sea                     | YP_003097238 | 114/134 | 85 | Group 2a |
| DA-phoH-16  | 129 | SAR_0m_phoH_30                       | Sargasso Sea                | AEQ27325     | 66/128  | 52 | Group α  |
| DA-phoH-17  | 135 | <i>Synechococcus</i> phage S-SSM7    | Sargasso Sea                | YP_004324370 | 115/134 | 86 | Group 2a |
| DA-phoH-18  | 135 | uncultured Mediterranean phage uvMED | Mediterranean Sea           | BAR30472     | 122/134 | 91 | Group 2a |
| DA-phoH-19  | 129 | MED_phoH_02                          | Mediterranean Sea           | AEQ27539     | 77/128  | 60 | Group 6c |
| DA-phoH-20  | 135 | <i>Synechococcus</i> phage S-SSM7    | Sargasso Sea                | YP_004324370 | 115/134 | 86 | Group 2a |
| DA-phoH-21  | 129 | MED_phoH_02                          | Mediterranean Sea           | AEQ27539     | 77/128  | 60 | Group 6c |
| DA-phoH-22  | 135 | <i>Synechococcus</i> phage S-SSM7    | Sargasso Sea                | YP_004324370 | 115/134 | 86 | Group 2a |
| DA-phoH-23  | 135 | <i>Synechococcus</i> phage S-RSM4    | Red Sea                     | YP_003097238 | 114/134 | 85 | Group 2a |
| DA-phoH-24  | 135 | uncultured Mediterranean phage uvMED | Mediterranean Sea           | BAR30472     | 107/134 | 80 | Group 2b |
| DA-phoH-25  | 129 | MED_phoH_08                          | Mediterranean Sea           | AEQ27545     | 77/128  | 60 | Group 6c |
| DA-phoH-26  | 135 | <i>Synechococcus</i> phage S-SSM7    | Sargasso Sea                | YP_004324370 | 121/134 | 90 | Group 2a |
| DA-phoH-27  | 135 | uncultured Mediterranean phage uvMED | Mediterranean Sea           | BAR30472     | 106/134 | 79 | Group 2b |







|              |     |                                           |                    |              |        |    |                |
|--------------|-----|-------------------------------------------|--------------------|--------------|--------|----|----------------|
| YJG-phoH-30  | 127 | <i>Acinetobacter</i> phage YMC13/03/R2096 | South Korea        | YP_009146825 | 58/124 | 47 | Group 2a       |
| YJG-phoH-31  | 127 | <i>Acinetobacter</i> phage YMC13/03/R2096 | South Korea        | YP_009146825 | 57/124 | 46 | Group 4b       |
| YJG-phoH-32  | 127 | <i>Acinetobacter</i> phage YMC13/03/R2096 | South Korea        | YP_009146825 | 58/124 | 47 | Group 2a       |
| YJG-phoH-33  | 127 | <i>Acinetobacter</i> phage YMC13/03/R2096 | South Korea        | YP_009146825 | 58/124 | 47 | Group 6b       |
| YJG-phoH-34  | 127 | <i>Acinetobacter</i> phage YMC13/03/R2096 | South Korea        | YP_009146825 | 58/124 | 47 | Group 6b       |
| YJG-phoH-35  | 127 | <i>Acinetobacter</i> phage YMC13/03/R2096 | South Korea        | YP_009146825 | 58/124 | 47 | Group 2a       |
| YJG-phoH-36  | 127 | <i>Acinetobacter</i> phage YMC13/03/R2096 | South Korea        | YP_009146825 | 58/124 | 47 | Group 2a       |
| YJG-phoH-37  | 127 | <i>Acinetobacter</i> phage YMC13/03/R2096 | South Korea        | YP_009146825 | 58/124 | 47 | Group 2a       |
| YJG-phoH-38  | 127 | <i>Acinetobacter</i> phage YMC13/03/R2096 | South Korea        | YP_009146825 | 58/124 | 47 | Group 2a       |
| YJG-phoH-39  | 127 | <i>Acinetobacter</i> phage YMC13/03/R2096 | South Korea        | YP_009146825 | 58/124 | 47 | Group 4b       |
| YJG-phoH-40  | 127 | <i>Acinetobacter</i> phage YMC13/03/R2096 | South Korea        | YP_009146825 | 58/124 | 47 | Group 4b       |
| YJG-phoH-41  | 127 | <i>Acinetobacter</i> phage YMC13/03/R2096 | South Korea        | YP_009146825 | 58/124 | 47 | Group 2a       |
| YJG-phoH-42  | 127 | <i>Acinetobacter</i> phage YMC13/03/R2096 | South Korea        | YP_009146825 | 58/124 | 47 | Group 2a       |
| YJG-phoH-43  | 127 | <i>Acinetobacter</i> phage YMC13/03/R2096 | South Korea        | YP_009146825 | 58/124 | 47 | Group 6b       |
| YJG-phoH-44  | 127 | <i>Acinetobacter</i> phage YMC13/03/R2096 | South Korea        | YP_009146825 | 56/124 | 45 | Group $\gamma$ |
| YJG-phoH-45  | 128 | SAR_phoH_27                               | Sargasso Sea       | AEQ27433     | 85/128 | 66 | Group 4b       |
| YJG-phoH-46  | 128 | SAR_phoH_27                               | Sargasso Sea       | AEQ27433     | 83/128 | 65 | Group 6b       |
| YJG-phoH-47  | 128 | SAR_phoH_27                               | Sargasso Sea       | AEQ27433     | 85/128 | 66 | Group 2a       |
| YJG-phoH-48  | 128 | SAR_phoH_27                               | Sargasso Sea       | AEQ27433     | 85/128 | 66 | Group 2a       |
| YJG-phoH-49  | 129 | MED_phoH_02                               | Mediterranean Sea  | AEQ27539     | 80/128 | 63 | Group 2a       |
| YJG-phoH-50  | 129 | SAR_phoH_67                               | Sargasso Sea       | AEQ27473     | 81/128 | 63 | Group 4b       |
| YJG-phoH-51  | 128 | SAR_phoH_27                               | Sargasso Sea       | AEQ27433     | 85/128 | 66 | Group 6b       |
| YJG-phoH-52  | 128 | SAR_phoH_27                               | Sargasso Sea       | AEQ27433     | 85/128 | 66 | Group 6b       |
| YJG-phoH-53  | 128 | SAR_phoH_27                               | Sargasso Sea       | AEQ27433     | 85/128 | 66 | Group 2a       |
| YJG-phoH-54  | 129 | MED_phoH_08                               | Mediterranean Sea  | AEQ27545     | 80/128 | 63 | Group 6b       |
| YJG-phoH-55  | 128 | SAR_phoH_27                               | Sargasso Sea       | AEQ27433     | 85/128 | 66 | Group 6a       |
| YJG-phoH-56  | 128 | SAR_phoH_27                               | Sargasso Sea       | AEQ27433     | 85/128 | 66 | Group 3e       |
| YJG-phoH-57  | 128 | SAR_100m_phoH_05                          | Sargasso Sea       | AEQ27480     | 80/130 | 62 | Group 2a       |
| YJG-phoH-58  | 128 | SAR_phoH_27                               | Sargasso Sea       | AEQ27433     | 85/128 | 66 | Group 2a       |
| YJG-phoH-59  | 128 | SAR_phoH_27                               | Sargasso Sea       | AEQ27433     | 83/128 | 65 | Group 6b       |
| YJG-phoH-60  | 128 | SAR_phoH_27                               | Sargasso Sea       | AEQ27433     | 84/128 | 66 | Group 2a       |
| YJG-phoH-61  | 129 | MED_phoH_02                               | Mediterranean Sea  | AEQ27539     | 80/128 | 63 | Group 6b       |
| YJG-phoH-62  | 198 | SAR_phoH_27                               | Sargasso Sea       | AEQ27433     | 84/128 | 66 | Group 4b       |
| YJG-phoH-63  | 129 | SAR_phoH_27                               | Sargasso Sea       | AEQ27433     | 77/128 | 60 | Group 2a       |
| YJG-phoH-64  | 129 | SAR_phoH_67                               | Sargasso Sea       | AEQ27473     | 81/128 | 63 | Group 3e       |
| YJG-phoH-65  | 128 | SAR_phoH_27                               | Sargasso Sea       | AEQ27433     | 85/128 | 66 | Group 2a       |
| YJG-phoH-66  | 129 | MED_phoH_08                               | Mediterranean Sea  | AEQ27545     | 79/128 | 62 | Group 2a       |
| YJG-phoH-67  | 128 | SAR_phoH_27                               | Sargasso Sea       | AEQ27433     | 84/128 | 66 | Group 2a       |
| YJG-phoH-68  | 128 | SAR_phoH_27                               | Sargasso Sea       | AEQ27433     | 85/128 | 66 | Group 6b       |
| YJG-phoH-69  | 128 | SAR_phoH_27                               | Sargasso Sea       | AEQ27433     | 85/128 | 66 | Group 6b       |
| YJG-phoH-70  | 129 | SAR_0m_phoH_30                            | Sargasso Sea       | AEQ27325     | 73/128 | 57 | Group 2a       |
| YJG-phoH-71  | 128 | SAR_phoH_27                               | Sargasso Sea       | AEQ27433     | 83/128 | 65 | Group 4b       |
| YJG-phoH-72  | 128 | SAR_phoH_27                               | Sargasso Sea       | AEQ27433     | 83/128 | 65 | Group 2a       |
| YJG-phoH-73  | 129 | MED_phoH_02                               | Mediterranean Sea  | AEQ27539     | 79/128 | 62 | Group $\delta$ |
| YJG-phoH-74  | 129 | SAR_phoH_67                               | Sargasso Sea       | AEQ27473     | 80/128 | 63 | Group $\delta$ |
| YJG-phoH-75  | 128 | SAR_100m_phoH_05                          | Sargasso Sea       | AEQ27480     | 80/130 | 62 | Group $\delta$ |
| YJG-phoH-76  | 128 | SAR_100m_phoH_05                          | Sargasso Sea       | AEQ27480     | 80/130 | 62 | Group $\delta$ |
| YJG-phoH-77  | 128 | SAR_100m_phoH_05                          | Sargasso Sea       | AEQ27480     | 80/130 | 62 | Group $\delta$ |
| YJG-phoH-78  | 128 | SAR_phoH_27                               | Sargasso Sea       | AEQ27433     | 85/128 | 66 | Group $\delta$ |
| YJG-phoH-79  | 128 | SAR_phoH_27                               | Sargasso Sea       | AEQ27433     | 84/128 | 66 | Group $\delta$ |
| YJG-phoH-80  | 128 | SAR_phoH_27                               | Sargasso Sea       | AEQ27433     | 84/128 | 66 | Group $\delta$ |
| YJG-phoH-81  | 129 | SAR_phoH_67                               | Sargasso Sea       | AEQ27473     | 81/128 | 63 | Group $\delta$ |
| YJG-phoH-82  | 129 | SAR_phoH_67                               | Sargasso Sea       | AEQ27473     | 81/128 | 63 | Group $\delta$ |
| YJG-phoH-83  | 128 | SAR_phoH_27                               | Sargasso Sea       | AEQ27433     | 84/128 | 66 | Group $\delta$ |
| YJG-phoH-84  | 128 | SAR_phoH_27                               | Sargasso Sea       | AEQ27433     | 85/128 | 66 | Group $\delta$ |
| YJG-phoH-85  | 129 | SAR_phoH_27                               | Sargasso Sea       | AEQ27433     | 85/128 | 66 | Group $\delta$ |
| YJG-phoH-86  | 129 | SAR_phoH_67                               | Sargasso Sea       | AEQ27473     | 80/128 | 63 | Group $\delta$ |
| YJG-phoH-87  | 129 | MED_phoH_08                               | Mediterranean Sea  | AEQ27545     | 80/128 | 63 | Group $\delta$ |
| YJG-phoH-88  | 128 | SAR_100m_phoH_05                          | Sargasso Sea       | AEQ27480     | 80/130 | 62 | Group $\delta$ |
| YJG-phoH-89  | 129 | MED_phoH_02                               | Mediterranean Sea  | AEQ27539     | 80/128 | 63 | Group $\delta$ |
| YJG-phoH-90  | 129 | MED_phoH_08                               | Mediterranean Sea  | AEQ27545     | 77/128 | 60 | Group $\delta$ |
| YJG-phoH-91  | 129 | BBC_phoH_01                               | British Columbia   | AEQ27556     | 74/128 | 58 | Group $\delta$ |
| YJG-phoH-92  | 128 | SAR_100m_phoH_05                          | Sargasso Sea       | AEQ27480     | 81/130 | 62 | Group $\delta$ |
| YJG-phoH-93  | 128 | SAR_phoH_27                               | Sargasso Sea       | AEQ27433     | 84/128 | 66 | Group $\delta$ |
| YJG-phoH-94  | 129 | MED_phoH_08                               | Mediterranean Sea; | AEQ27545     | 80/128 | 63 | Group $\delta$ |
| YJG-phoH-95  | 128 | SAR_0m_phoH_37                            | Sargasso Sea       | AEQ27332     | 80/127 | 63 | Group $\delta$ |
| YJG-phoH-96  | 129 | MED_phoH_08                               | Mediterranean Sea; | AEQ27545     | 80/128 | 63 | Group $\delta$ |
| YJG-phoH-97  | 128 | SAR_phoH_27                               | Sargasso Sea       | AEQ27433     | 84/128 | 66 | Group $\delta$ |
| YJG-phoH-98  | 129 | BBC_phoH_01                               | British Columbia   | AEQ27556     | 75/128 | 59 | Group $\delta$ |
| YJG-phoH-99  | 128 | SAR_phoH_27                               | Sargasso Sea       | AEQ27433     | 84/128 | 66 | Group $\delta$ |
| YJG-phoH-100 | 128 | SAR_phoH_27                               | Sargasso Sea       | AEQ27433     | 82/128 | 64 | Group $\delta$ |
| YJG-phoH-101 | 128 | SAR_100m_phoH_05                          | Sargasso Sea       | AEQ27480     | 80/130 | 62 | Group $\delta$ |
| YJG-phoH-102 | 129 | MED_phoH_02                               | Mediterranean Sea  | AEQ27539     | 78/128 | 61 | Group $\delta$ |
| YJG-phoH-103 | 129 | SAR_phoH_67                               | Sargasso Sea       | AEQ27473     | 78/128 | 61 | Group $\delta$ |
| YJG-phoH-104 | 128 | SAR_phoH_27                               | Sargasso Sea       | AEQ27433     | 85/128 | 66 | Group $\delta$ |
| YJG-phoH-105 | 128 | SAR_phoH_27                               | Sargasso Sea       | AEQ27433     | 85/128 | 66 | Group 2a       |
| YJG-phoH-106 | 128 | SAR_phoH_27                               | Sargasso Sea       | AEQ27433     | 85/128 | 66 | Group 6b       |
| YJG-phoH-107 | 129 | MED_phoH_08                               | Mediterranean Sea  | AEQ27545     | 80/128 | 63 | Group 2a       |
| YJG-phoH-108 | 128 | SAR_phoH_27                               | Sargasso Sea       | AEQ27433     | 83/128 | 65 | Group 2a       |
| YJG-phoH-109 | 128 | SAR_phoH_27                               | Sargasso Sea       | AEQ27433     | 85/128 | 66 | Group 6b       |
| YJG-phoH-110 | 129 | MED_phoH_02                               | Mediterranean Sea  | AEQ27539     | 80/128 | 63 | Group 3e       |
| YJG-phoH-111 | 129 | BBC_phoH_01                               | British Columbia   | AEQ27556     | 74/128 | 58 | Group 6b       |
| YJG-phoH-112 | 129 | MED_phoH_08                               | Mediterranean Sea  | AEQ27545     | 77/128 | 60 | Group 3e       |
| YJG-phoH-113 | 129 | BBC_phoH_01                               | British Columbia   | AEQ27556     | 74/128 | 58 | Group 6b       |

|              |     |                  |                   |          |        |    |                |
|--------------|-----|------------------|-------------------|----------|--------|----|----------------|
| YJG-phoH-114 | 129 | MED_phoH_08      | Mediterranean Sea | AEQ27545 | 80/128 | 63 | Group 6a       |
| YJG-phoH-115 | 129 | MED_phoH_08      | Mediterranean Sea | AEQ27545 | 77/128 | 60 | Group 2a       |
| YJG-phoH-116 | 128 | SAR_100m_phoH_05 | Sargasso Sea      | AEQ27480 | 81/130 | 62 | Group 6b       |
| YJG-phoH-117 | 129 | MED_phoH_02      | Mediterranean Sea | AEQ27539 | 78/128 | 61 | Group 2a       |
| YJG-phoH-118 | 128 | SAR_phoH_27      | Sargasso Sea      | AEQ27433 | 85/128 | 66 | Group 2a       |
| YJG-phoH-119 | 128 | SAR_100m_phoH_05 | Sargasso Sea      | AEQ27480 | 80/130 | 62 | Group 2a       |
| YJG-phoH-120 | 128 | SAR_phoH_27      | Sargasso Sea      | AEQ27433 | 83/128 | 65 | Group 2a       |
| YJG-phoH-121 | 128 | SAR_phoH_27      | Sargasso Sea      | AEQ27433 | 85/128 | 66 | Group 6b       |
| YJG-phoH-122 | 129 | SAR_phoH_67      | Sargasso Sea      | AEQ27473 | 81/128 | 63 | Group $\gamma$ |
| YJG-phoH-123 | 129 | SAR_phoH_67      | Sargasso Sea      | AEQ27473 | 81/128 | 63 | Group 6b       |
| YJG-phoH-124 | 128 | SAR_phoH_27      | Sargasso Sea      | AEQ27433 | 84/128 | 66 | Group 2a       |
| YJG-phoH-125 | 129 | MED_phoH_08      | Mediterranean Sea | AEQ27545 | 80/128 | 63 | Group 6b       |

<sup>a</sup>The length of amino acid residues.

<sup>b</sup>Accession number of amino acid sequences.

**Table S4.** The statistical overview of the closest relative of the *phoH* clones from the four paddy water samples in this study.

| Source            | Accession number | Clone/isolate                             | Daan (166) <sup>a</sup> |              | Suihua (97) <sup>a</sup> |              | Mudanjiang (36) <sup>a</sup> |              | Yanjiagang (125) <sup>a</sup> |              |
|-------------------|------------------|-------------------------------------------|-------------------------|--------------|--------------------------|--------------|------------------------------|--------------|-------------------------------|--------------|
|                   |                  |                                           | Number of clones        | Identity (%) | Number of clones         | Identity (%) | Number of clones             | Identity (%) | Number of clones              | Identity (%) |
| Sargasso Sea      | YP_004324370     | <i>Synechococcus</i> phage S-SSM7         | 75                      | 84-90        |                          |              |                              |              |                               |              |
|                   | AEQ27325         | SAR_0m_phoH_30                            | 10                      | 51-63        | 2                        | 57, 58       | 2                            | 57, 59       | 1                             | 57           |
|                   | AEQ27392         | SAR_1000m_phoH_14                         | 1                       | 61           |                          |              |                              |              | 6                             | 48-68        |
|                   | AEQ27324         | SAR_0m_phoH_29                            |                         |              | 8                        | 55, 56       |                              |              |                               |              |
|                   | AEQ27389         | SAR_1000m_phoH_11                         |                         |              | 4                        | 54, 55       |                              |              |                               |              |
|                   | AKV56976         | SAR_phoH_Mar_2011_0m_04                   |                         |              | 1                        | 54           | 3                            | 54           |                               |              |
|                   | AKV56959         | SAR_phoH_Sept_2010_0m_09                  |                         |              | 3                        | 84, 85       |                              |              |                               |              |
|                   | AKV57024         | SAR_phoH_Sept_2011_100m_02                |                         |              | 2                        | 55, 56       |                              |              |                               |              |
|                   | AEQ27332         | SAR_0m_phoH_37                            |                         |              |                          |              | 1                            | 55           | 1                             | 63           |
|                   | AEQ27433         | SAR_phoH_27                               |                         |              |                          |              |                              |              | 39                            | 60-66        |
|                   | AEQ27473         | SAR_phoH_67                               |                         |              |                          |              |                              |              | 9                             | 61, 63       |
|                   | AEQ27480         | SAR_100m_phoH_05                          |                         |              |                          |              |                              |              | 9                             | 62           |
|                   | AEQ27394         | SAR_1000m_phoH_16                         |                         |              |                          |              |                              |              | 6                             | 68-70        |
| Mediterranean Sea | BAR30472         | uncultured phage uvMED                    | 31                      | 77-92        |                          |              |                              |              |                               |              |
|                   | AEQ27539         | MED_phoH_02                               | 24                      | 60-62        |                          |              |                              |              | 7                             | 61-63        |
|                   | AEQ27545         | MED_phoH_08                               | 2                       | 60           |                          |              |                              |              | 11                            | 60-63        |
|                   | AEQ27550         | MED_phoH_13                               | 3                       | 59, 60       | 67                       | 57-60        |                              |              |                               |              |
| Gulf of Mexico    | AEQ27527         | GOM_phoH_09                               |                         |              | 10                       | 55           | 30                           | 54-56        |                               |              |
| British Columbia  | AEQ27556         | BBC_phoH_01                               |                         |              |                          |              |                              |              | 4                             | 58, 59       |
| Red Sea           | YP_003097238     | <i>Synechococcus</i> phage S-RSM4         | 20                      | 84-86        |                          |              |                              |              |                               |              |
| South Korea       | YP_009146825     | <i>Acinetobacter</i> phage YMC13/03/R2096 |                         |              |                          |              |                              |              | 32                            | 45-47        |

<sup>a</sup>Number in parenthesis is the total number of clones obtained from each sample.
